# Supplementary material for: The mechanistic role of a support–catalyst interface in electrocatalytic water reduction by Co3O4 supported nanocarbon florets
Source: Royal Society of Chemistry journal article supplement (doi:10.1039/c9nr03907d), 2019-01-01
Supplement: c9nr03907d1.pdf [file c9nr03907d1.pdf]

SUPPORTING INFORMATION

**Mechanistic role of support-catalyst interface in electrocatalytic water reduction by  
Co<sub>3</sub>O<sub>4</sub> supported nanocarbon florets**

Jayeeta Saha<sup>†a</sup>, Ranadeb Ball<sup>†a</sup>, Ananya Sah<sup>a</sup>, Vishwanath Kalyani<sup>a</sup>, Chandramouli Subramaniam<sup>\*a</sup>

Department of Chemistry, Indian Institute of Technology, Powai, Mumbai, Maharashtra 400076, India.

## Table of Contents

| Serial No. | Title                                                                                                                                                         | Page No. |
|------------|---------------------------------------------------------------------------------------------------------------------------------------------------------------|----------|
| Figure S1  | SEM and TEM image of DFNS                                                                                                                                     | 3        |
| Figure S2  | SEM image and Surface area plot of DFNS                                                                                                                       | 4        |
| Table S1   | Summary of SSA of different nanocarbons                                                                                                                       | 5        |
| Figure S3  | SEM image of -NCF                                                                                                                                             | 6        |
| Figure S4  | TEM image of Co <sub>3</sub> O <sub>4</sub> -NCF                                                                                                              | 6        |
| Figure S5  | TGA, Raman spectroscopy and XPS of Co <sub>3</sub> O <sub>4</sub> -NCF                                                                                        | 7        |
| Figure S6  | SEM and TEM image of pure Co <sub>3</sub> O <sub>4</sub>                                                                                                      | 8        |
| Figure S7  | XRD, XPS and Raman spectroscopy of pure Co <sub>3</sub> O <sub>4</sub>                                                                                        | 9        |
| Figure S8  | Electrochemical data of Co <sub>3</sub> O <sub>4</sub> -NCF in acidic (H <sub>2</sub> SO <sub>4</sub> ) medium                                                | 10       |
| Table S2   | Electrochemical comparison of Co <sub>3</sub> O <sub>4</sub> -NCF and pure Co <sub>3</sub> O <sub>4</sub>                                                     | 10       |
| Table S3   | Summary of electrochemical parameter of different catalysts                                                                                                   | 11       |
| Table S4   | Summary of SSA and capacitive double layer with different catalysts                                                                                           | 12       |
| Figure S9  | Schematic representation of operand setup                                                                                                                     | 13       |
| Figure S10 | Operando Raman spectra of Co <sub>3</sub> O <sub>4</sub> -NCF in basic condition with applied potential                                                       | 14       |
| Figure S11 | Operando Raman spectra of Co <sub>3</sub> O <sub>4</sub> -NCF in acidic condition with applied potential                                                      | 15       |
| Figure S12 | Comparison of CV of Co <sub>3</sub> O <sub>4</sub> -NCF with Pt and graphite electrode                                                                        | 16       |
| Figure S13 | Redox behaviour of Co <sub>3</sub> O <sub>4</sub> -NCF in acidic and basic medium                                                                             | 17       |
| Table S5   | ICP-AES analysis of acid treated Co <sub>3</sub> O <sub>4</sub> -NCF                                                                                          | 17       |
| Figure S14 | Comparison of XPS: before and after electrochemistry                                                                                                          | 18       |
| Figure S15 | Time resolved in-situ Raman spectro-electrochemical study of Co <sub>3</sub> O <sub>4</sub> -NCF in heavy water (D <sub>2</sub> O) for aHER at -0.4V (vs RHE) | 19       |
| Figure S16 | Electrochemical data of Co <sub>3</sub> O <sub>4</sub> -NCF in acidic (HClO <sub>4</sub> ) medium                                                             | 19       |
| Scheme S1  | Proposed mechanism of HER with Co <sub>3</sub> O <sub>4</sub> -NCF                                                                                            | 20       |
| References | References                                                                                                                                                    | 20       |

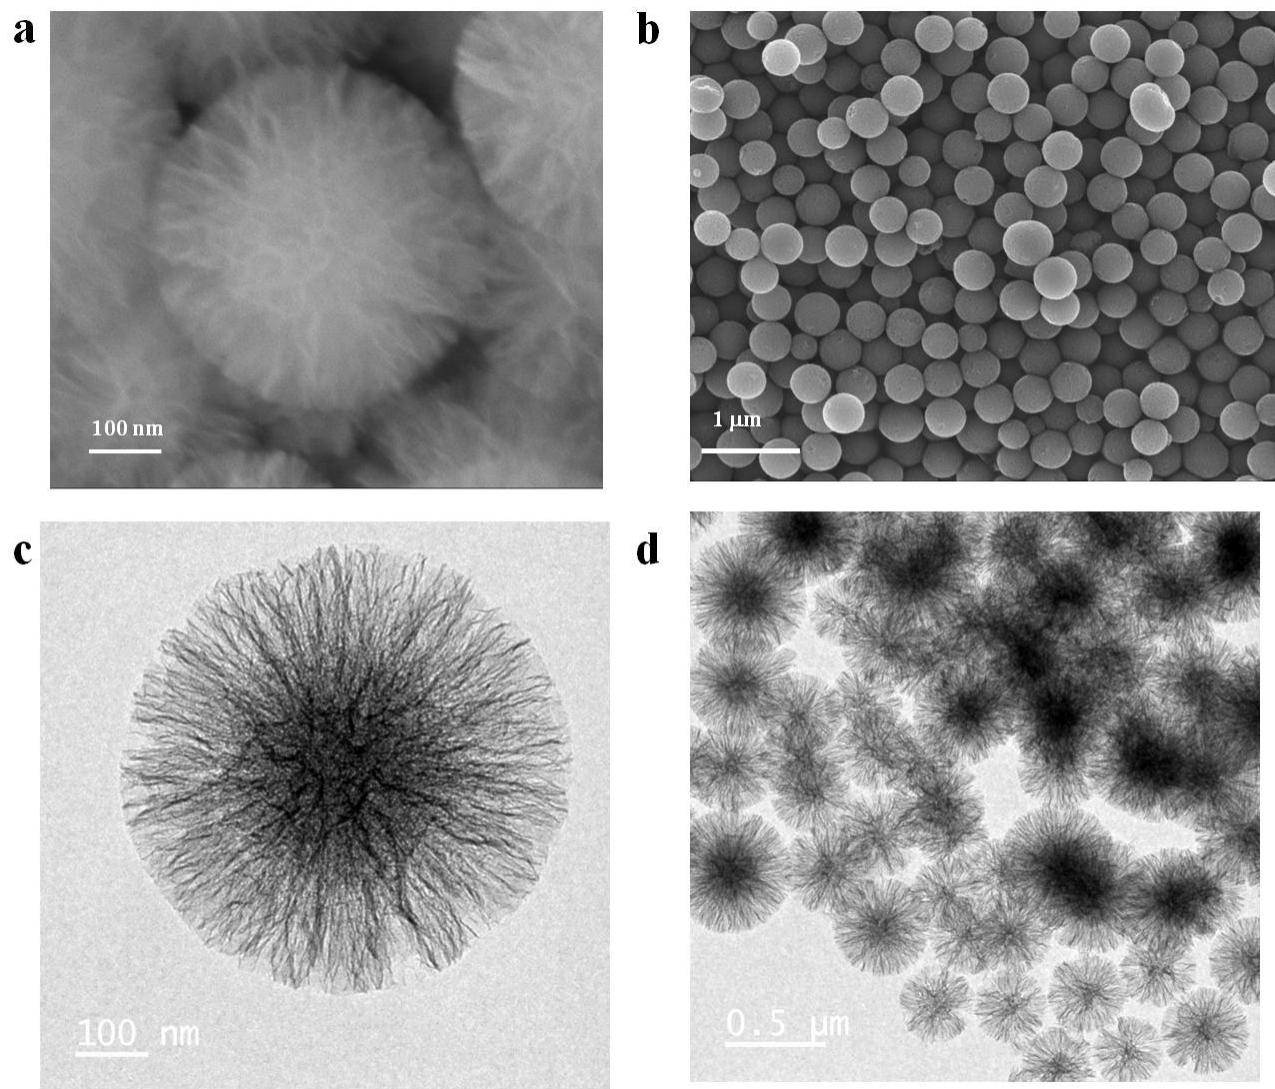

**Figure S1.** (a,b) SEM images and (c,d) TEM image of DFNS.

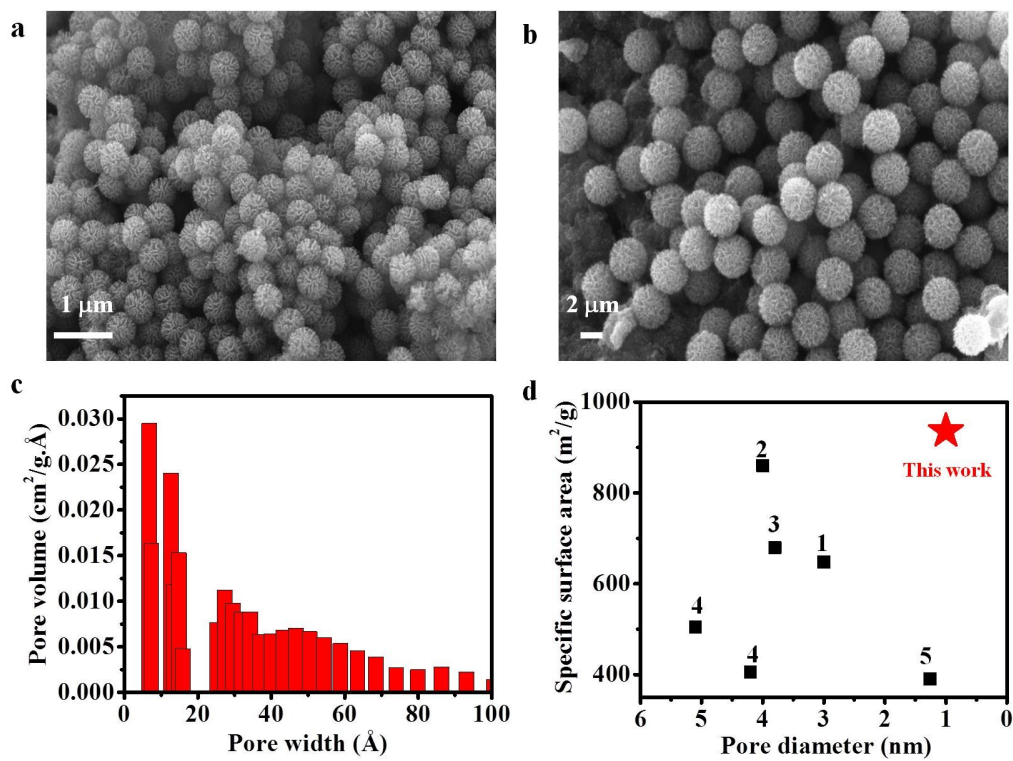

**Figure S2.** (a, b) SEM images of NCF. (c) Pore-width distribution of NCF. (d) Ashby plot of SSA with pore diameter with different material.<sup>1-5</sup>

**Table S1.** Summary of specific surface area and pore diameter of various carbon materials

| <b>Serial No.</b> | <b>Material</b>                  | <b>Specific surface area (m<sup>2</sup>/g)</b> | <b>Pore diameter (nm)</b> | <b>References</b> |
|-------------------|----------------------------------|------------------------------------------------|---------------------------|-------------------|
| 1                 | Nanocarbon floret (NCF)          | 936                                            | < 1                       | This work         |
| 2                 | Carbon hollow spheres            | 648                                            | 3                         | 1                 |
| 3                 | HMCSs                            | 769.5                                          | 3.8                       | 3                 |
| 4                 | HCSs                             | 88                                             | -                         | 6                 |
| 5                 | Annealed HCSs                    | 328                                            | -                         |                   |
| 6                 | Hollow carbon nanospheres        | 42                                             | -                         | 7                 |
| 7                 | Mesoporous Carbons               | 200                                            | 20-50                     | 8                 |
| 8                 | Hollow carbon sphere             | 860                                            | 2-4                       | 2                 |
| 9                 | N-doped hollow mesoporous carbon | 504                                            | 5.1                       | 4                 |
| 10                | Hollow carbon sphere             | 390                                            | 1.26                      | 5                 |
| 11                | Activated porous carbon          | 405                                            | 4.2                       | 9                 |
| 12                | Co-m-NC                          | 342                                            | 4.7                       | 10                |
| 13                | MCN                              | 596                                            | -                         | 11                |
| 14                | HMC                              | 340                                            | -                         | 12                |

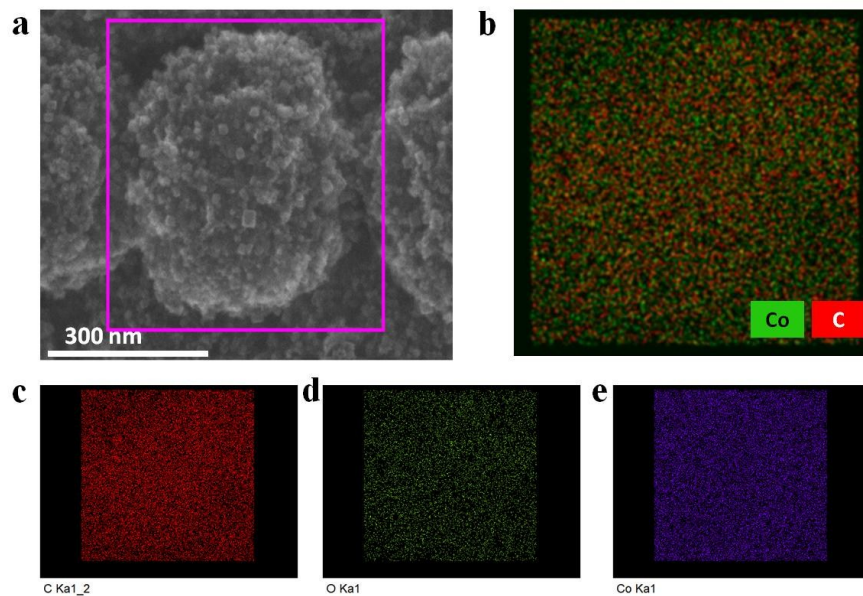

**Figure S3.** (a) SEM image and (b) composite mapping of Co (green) and C (red) of  $\text{Co}_3\text{O}_4\text{-NCF}$ . Individual mapping of (c) C, (d) O and (e) Co.

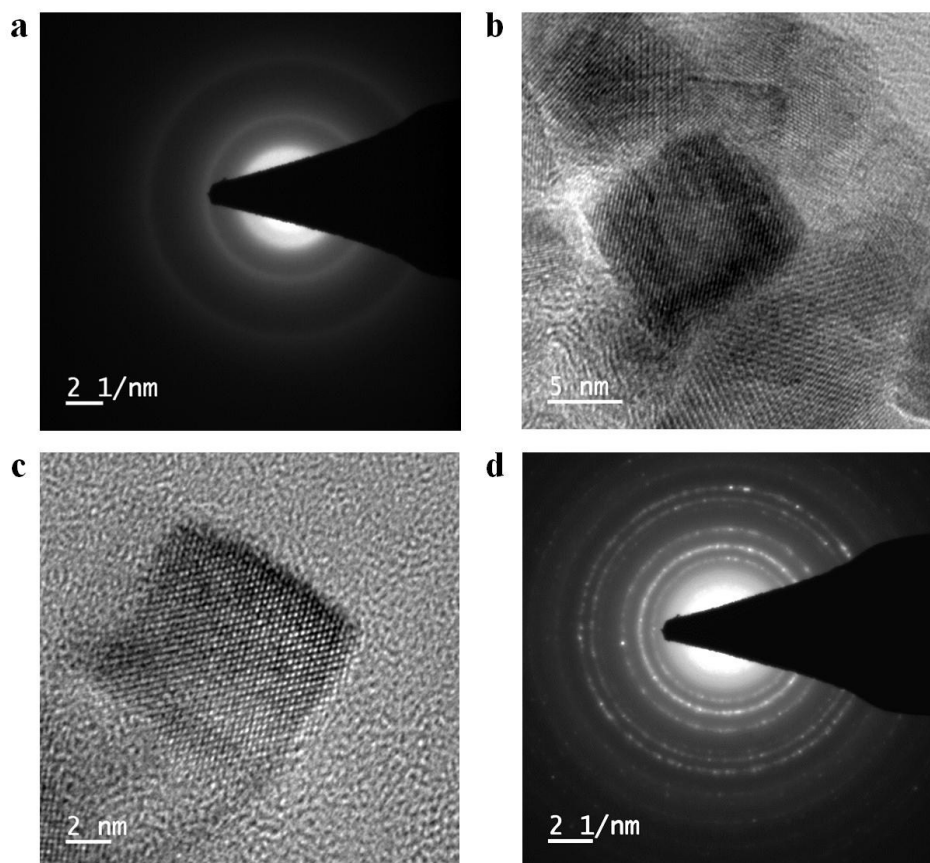

**Figure S4.** SAED pattern of (a) pristine NCF and (b, c) HRTEM and (d) SAED pattern of  $\text{Co}_3\text{O}_4\text{-NCF}$ .

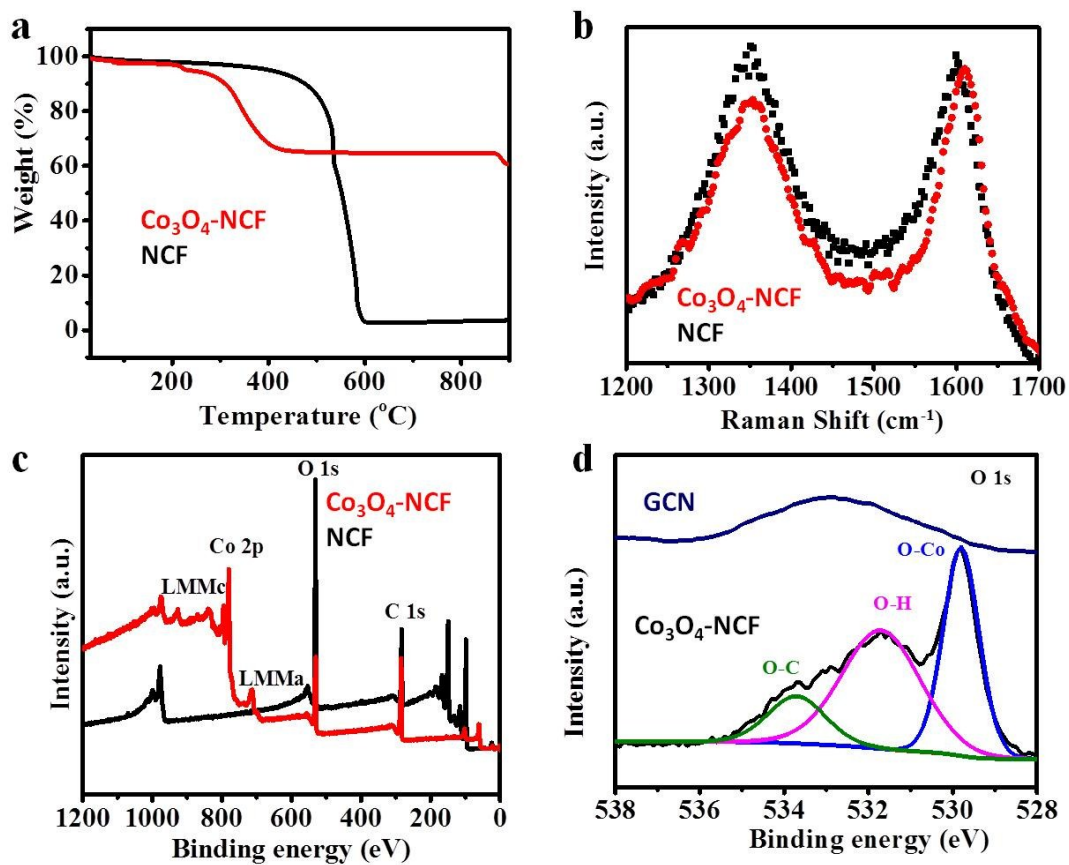

**Figure S5.** (a) Thermo-gravimetric analysis (TGA) of pristine NCF and  $\text{Co}_3\text{O}_4\text{-NCF}$ . (b) Raman spectra of pristine NCF and  $\text{Co}_3\text{O}_4\text{-NCF}$  (c) XPS of pristine NCF and  $\text{Co}_3\text{O}_4\text{-NCF}$ . (d) O 1s XPS of NCF and deconvolution of O 1s XPS of  $\text{Co}_3\text{O}_4\text{-NCF}$ .

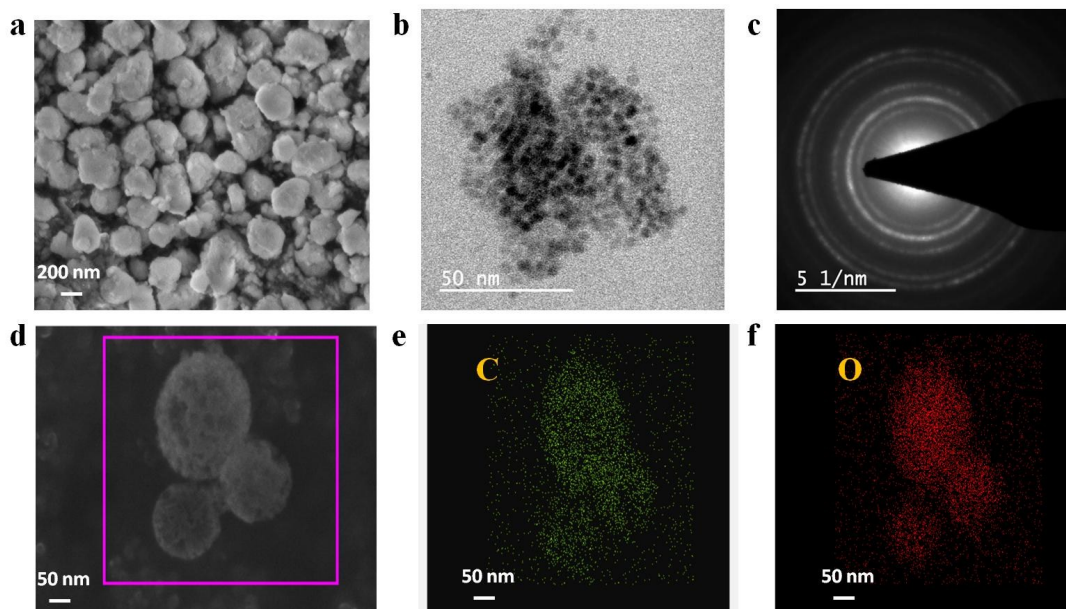

**Figure S6.** (a) SEM and (b) TEM image of pure  $\text{Co}_3\text{O}_4$  prepared without NCF. (c) SAED pattern of pure  $\text{Co}_3\text{O}_4$ . (d) EDS mapping of pure  $\text{Co}_3\text{O}_4$ , (e) Carbon mapping and (f) Oxygen mapping.



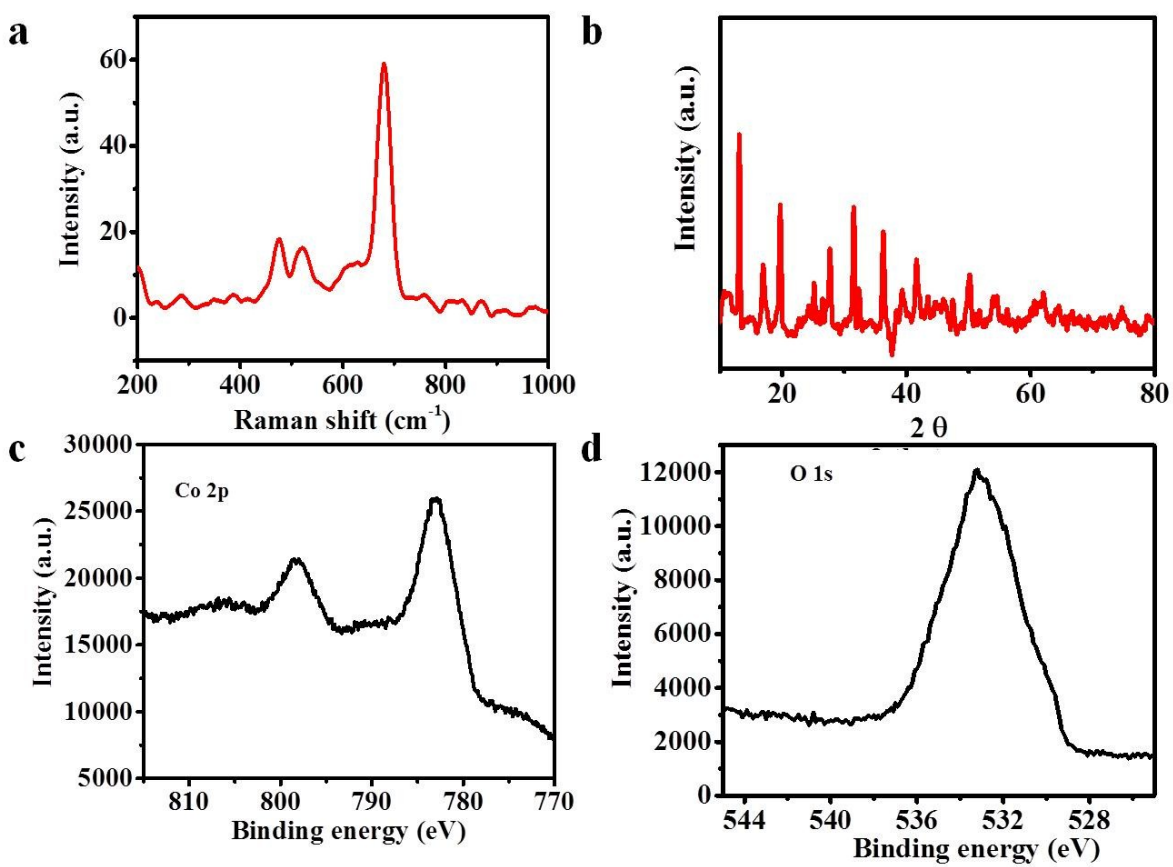

**Figure S7.** (a) Raman spectra, (b) XRD, (c) Co 2p XPS and (d) O 1s XPS of pure  $\text{Co}_3\text{O}_4$ .

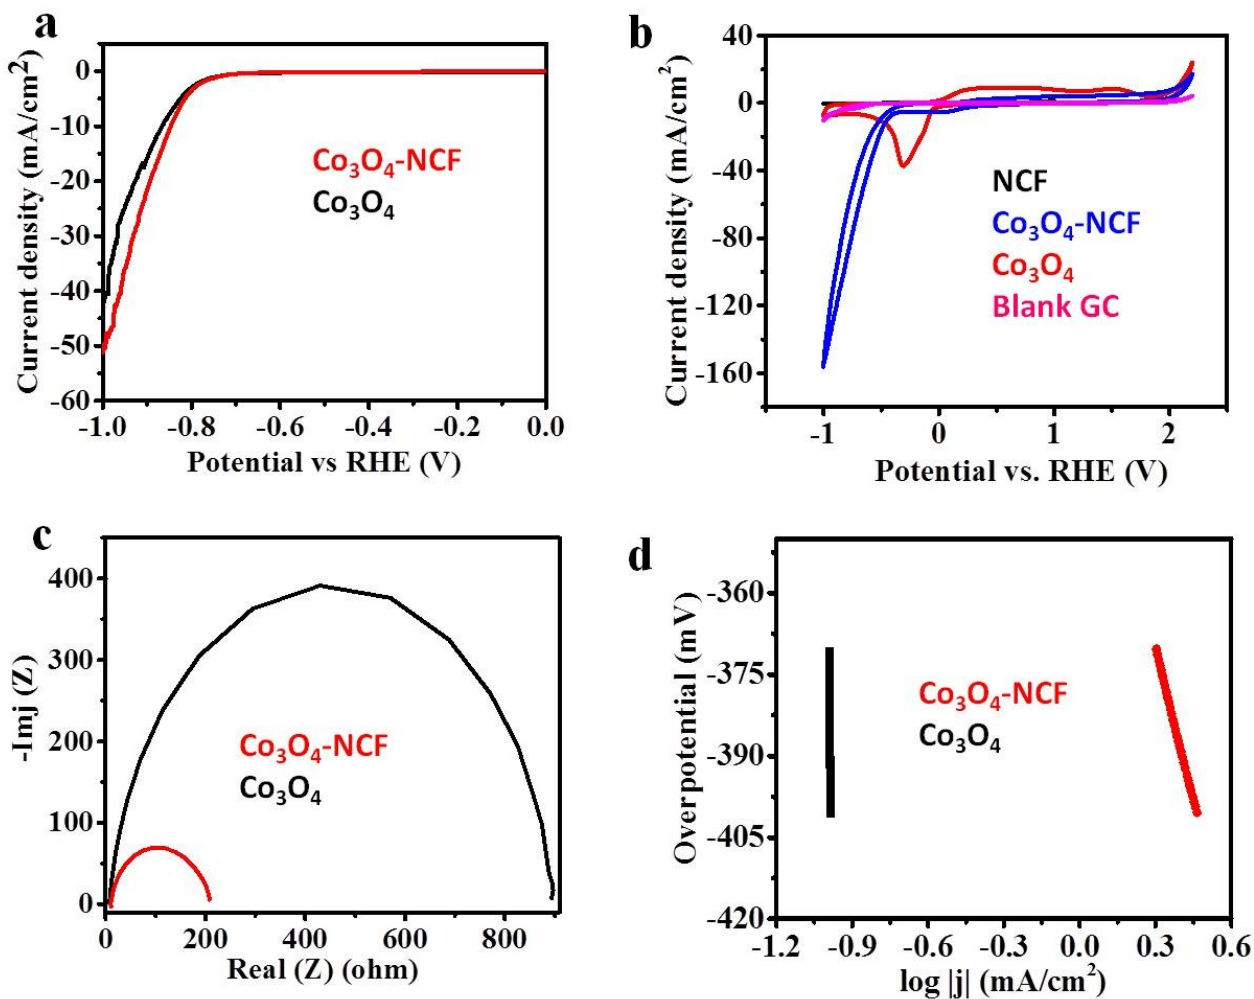

**Figure S8.** (a) Linear sweep voltammetry in 0.5 M  $\text{H}_2\text{SO}_4$  (pH=0.5) of pure  $\text{Co}_3\text{O}_4$  and  $\text{Co}_3\text{O}_4\text{-NCF}$  (scan rate= 2 mV/s). (b) Cyclic voltammetry in 0.5 M  $\text{H}_2\text{SO}_4$  (pH=0.5) of blank glassy carbon (GC), pristine NCF, pure  $\text{Co}_3\text{O}_4$  and  $\text{Co}_3\text{O}_4\text{-NCF}$  (scan rate= 100 mV/s). (c) Nyquist plots of pure  $\text{Co}_3\text{O}_4$  and  $\text{Co}_3\text{O}_4\text{-NCF}$ . (d) Tafel plots of pure  $\text{Co}_3\text{O}_4$  and  $\text{Co}_3\text{O}_4\text{-NCF}$ .

### Tafel slope calculation

The current density ( $j$ ) vs overpotential ( $t$ ) data obtained from LSV (2 mV/s) were transformed into overpotential ( $t$ ) vs  $\log(|j|)$ . Further, the overpotential varied linearly as a function of  $\log(|j|)$  from  $\log(|j|)=0$  to 1 (1 corresponds to  $j=10 \text{ mA/cm}^2$ ). The slope of the function was obtained using linear fit having  $R^2=0.998$ , which gives the Tafel slope (mV/dec) for HER in alkaline and acidic medium.

**Table S2.** Equivalent circuit extracted circuit parameters for different systems investigated.

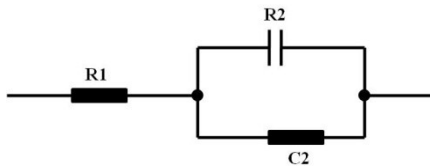

| Catalyst                            | Medium                               | R1 Electrolyte Resistance (ohm) | R2 Charge transfer resistance (ohm) | C <sub>dl</sub> double layer capacitance (mF/cm <sup>2</sup> ) |
|-------------------------------------|--------------------------------------|---------------------------------|-------------------------------------|----------------------------------------------------------------|
| Pure Co <sub>3</sub> O <sub>4</sub> | 0.5 M H <sub>2</sub> SO <sub>4</sub> | 7.887                           | 846.4                               | 42                                                             |
| Co <sub>3</sub> O <sub>4</sub> -NCF | 0.5 M H <sub>2</sub> SO <sub>4</sub> | 10.74                           | 170.5                               | 190                                                            |
| Pure Co <sub>3</sub> O <sub>4</sub> | 1 M KOH                              | 14.04                           | 350.9                               | 36.5                                                           |
| Co <sub>3</sub> O <sub>4</sub> -NCF | 1 M KOH                              | 16.39                           | 35.8                                | 410                                                            |
| Pure Co <sub>3</sub> O <sub>4</sub> | 0.5 M HClO <sub>4</sub>              | 37.98                           | 1986                                | 31                                                             |
| Co <sub>3</sub> O <sub>4</sub> -NCF | 0.5 M HClO <sub>4</sub>              | 57.27                           | 80                                  | 75                                                             |

**Table S3.** Summary of electrochemical parameters of some reported catalysts

| Serial No. | Catalyst                                          | Medium  | Overpotential (mV) | Current density (mA/cm <sup>2</sup> ) | Tafel slope (mV/dec) | Reference (SI) |
|------------|---------------------------------------------------|---------|--------------------|---------------------------------------|----------------------|----------------|
| 1          | Co <sub>3</sub> O <sub>4</sub> -NCF               | 1 M KOH | 460                | 10                                    | 119                  | This work      |
| 2          | Co <sub>3</sub> O <sub>4</sub> -NCNT              | 1 M KOH | 350                | 10                                    | -                    | 13             |
| 3          | Co <sub>3</sub> O <sub>4</sub> -carbon paper      | 1 M KOH | 350                | 16.5                                  | 115                  | 14             |
| 4          | Co <sub>3</sub> O <sub>4</sub> -calcinated carbon | 1 M KOH | 350                | 8.5                                   | 198                  | 14             |
| 5          | CoO <sub>x</sub> -CC                              | 1 M KOH | 193                | 20                                    | -                    | 15             |
| 6          | U-CNT-900                                         | 1 M KOH | 240                | 10                                    | -                    | 16             |
| 7          | Co <sub>3</sub> O <sub>4</sub> -Ni foam           | 1 M KOH | 50                 | 1                                     | -                    | 17             |

**Table S4.** Summary of SSA and C<sub>dl</sub> of recently reported materials

| Serial No. | Materials                                       | SSA (m <sup>2</sup> /g) | C <sub>dl</sub> (mF/cm <sup>2</sup> ) | Reference |
|------------|-------------------------------------------------|-------------------------|---------------------------------------|-----------|
| 1          | Metal-N-C (M=W, Mo, Cr, Mn, Fe, Co, Ni, Cu, Zn) | 712-382                 | -                                     | 18        |
| 2          | Co <sub>3</sub> O <sub>4</sub> -NCNT            | 37                      | -                                     | 13        |
| 3          | CoO <sub>x</sub> -CNT-CC                        | 88                      | 1155                                  | 15        |
| 4          | Co <sub>3</sub> O <sub>4</sub> -NCF             | 646                     | 410                                   | This work |

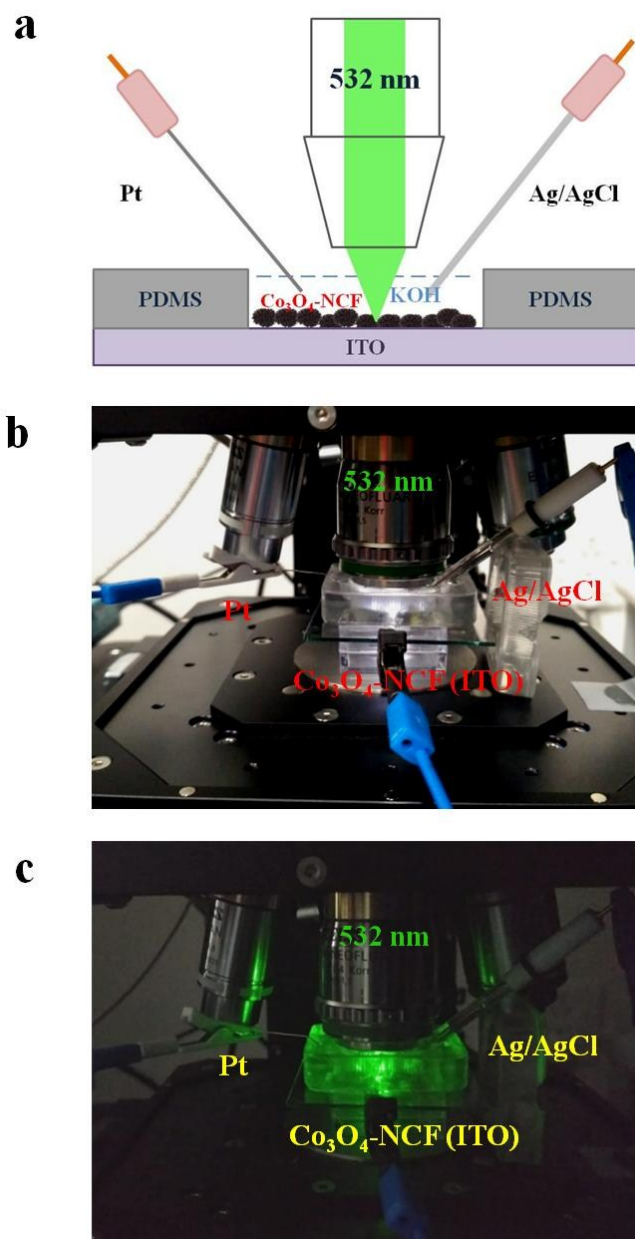

**Figure S9.** (a) Schematic representation of the operando Raman setup. Photograph of customized operando Raman setup with laser on (b) and laser off (c).

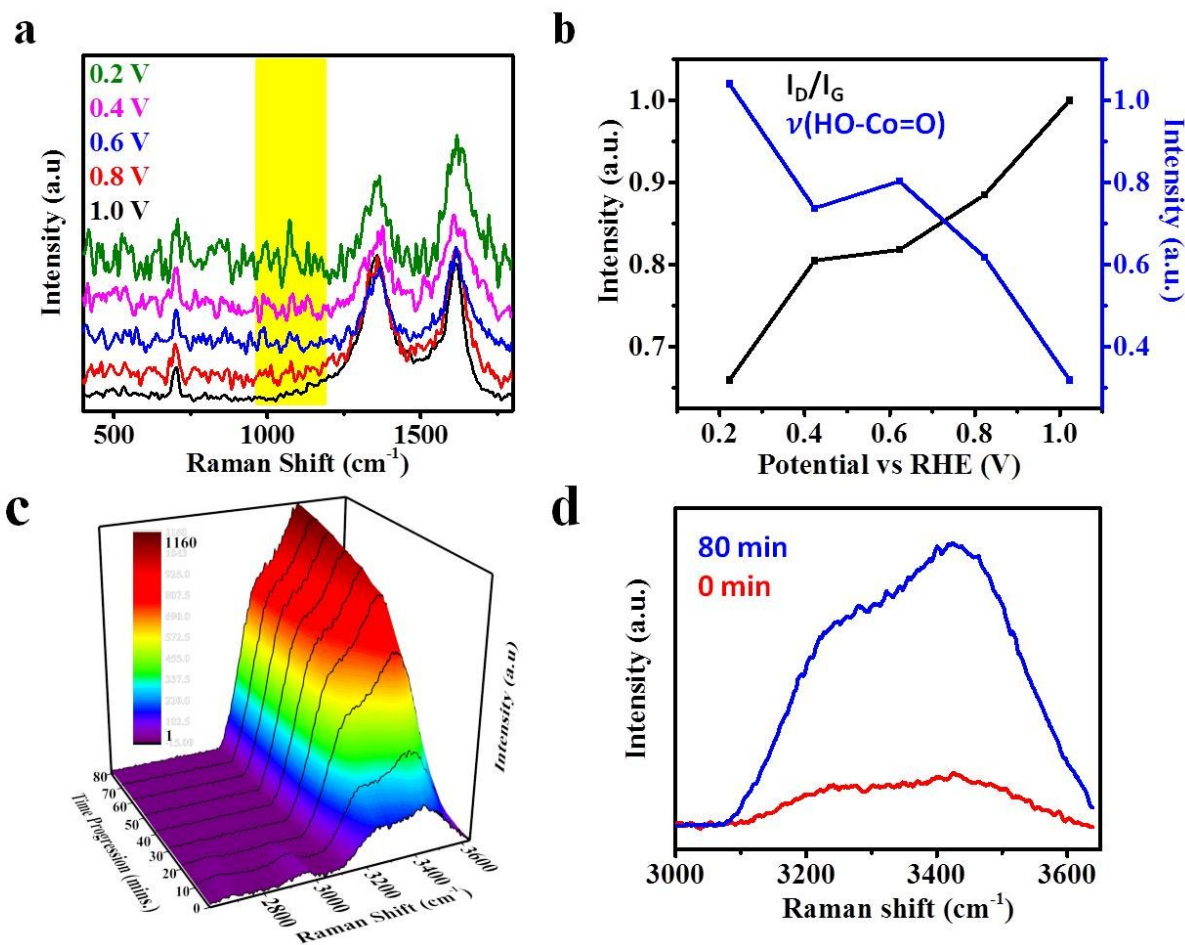

**Figure S10.** (a) Operando Raman spectra of  $\text{Co}_3\text{O}_4\text{-NCF}$  in 1 M KOH with different applied potential. (b) Evolution of  $I_D/I_G$  (blue) and  $\text{HO-Co=O}$  (black) in 1 M KOH.<sup>2</sup> (c) Operando Raman spectroscopy of HER at 0.8 V (vs RHE) in 1 M KOH using  $\text{Co}_3\text{O}_4\text{-NCF}$  catalyst (region 2600-3600  $\text{cm}^{-1}$ ). (d) Raman spectroscopy of HER at 0.8 V (vs RHE) in 1 M KOH using  $\text{Co}_3\text{O}_4\text{-NCF}$  catalyst (region 2600-3600  $\text{cm}^{-1}$ ) at 0 min (red) and 80 min (blue).

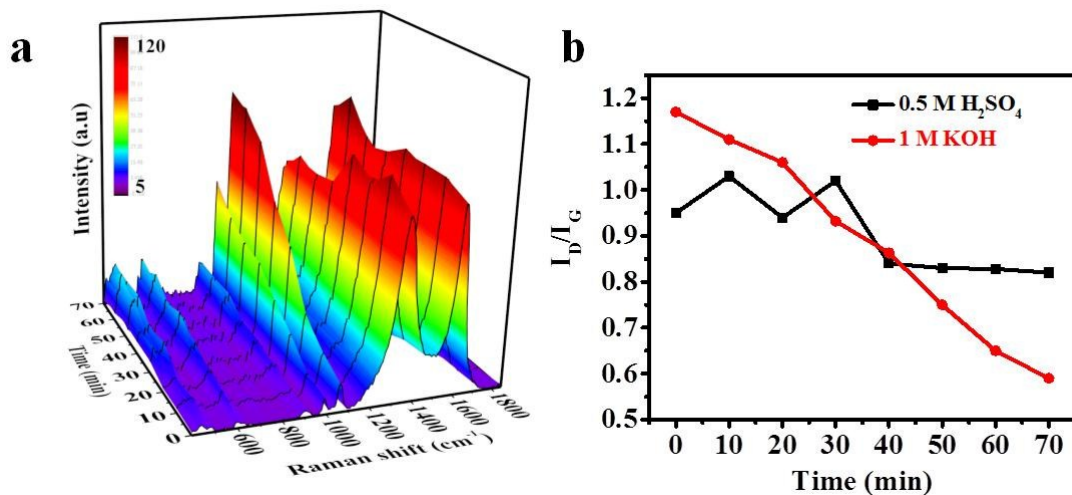

**Figure S11.** (a) Operando Raman spectroscopy of HER at 0.2 V (vs RHE) in 0.5 M H<sub>2</sub>SO<sub>4</sub> using Co<sub>3</sub>O<sub>4</sub>-NCF catalyst. (b) Spectral evolution of  $I_D/I_G$  with time in 0.5 M H<sub>2</sub>SO<sub>4</sub> (black) and 1 M KOH (red).

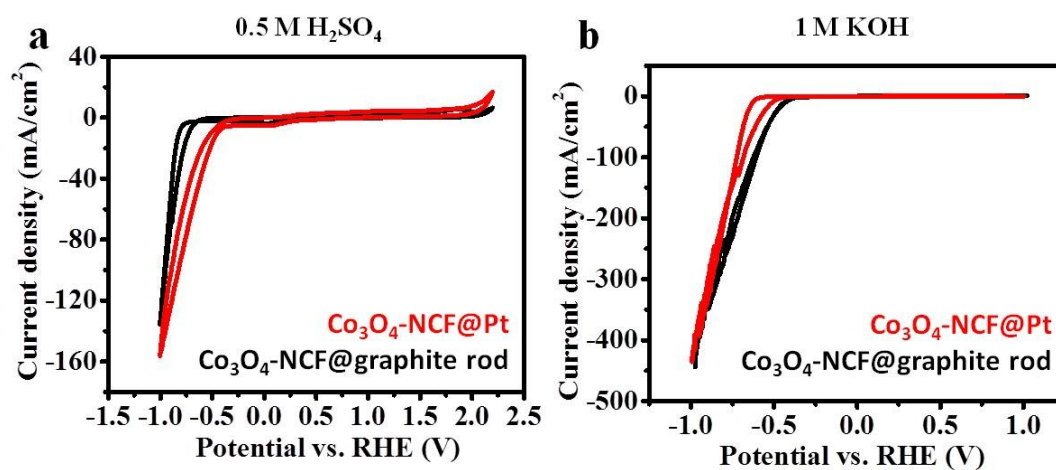

**Figure S12.** Comparison CV of Co<sub>3</sub>O<sub>4</sub>-NCF with different counter electrodes (graphite rod and Pt) in both (a) acidic and (b) alkaline pH.

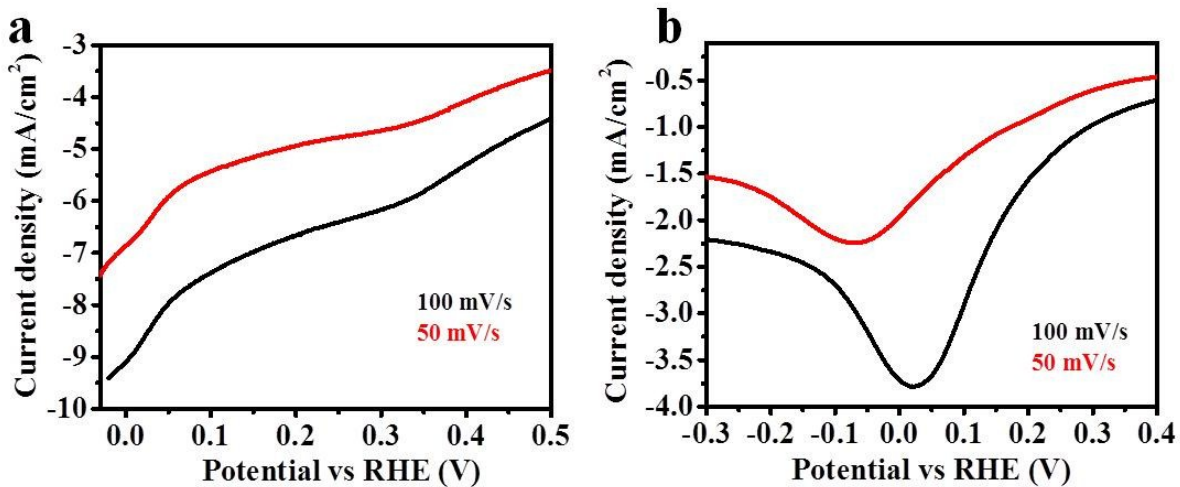

**Figure S13.** Cyclic voltammogram (CV) of  $\text{Co}_3\text{O}_4\text{-NCF}$  in (a) basic medium and (b) acidic medium.

**Table S5.** ICP-AES analysis of acid treated  $\text{Co}_3\text{O}_4\text{-NCF}$

| Sample                                                        | Concentration of Cobalt (ppm) |
|---------------------------------------------------------------|-------------------------------|
| $\text{Co}_3\text{O}_4\text{-NCF}$ in $\text{H}_2\text{SO}_4$ | > 140                         |



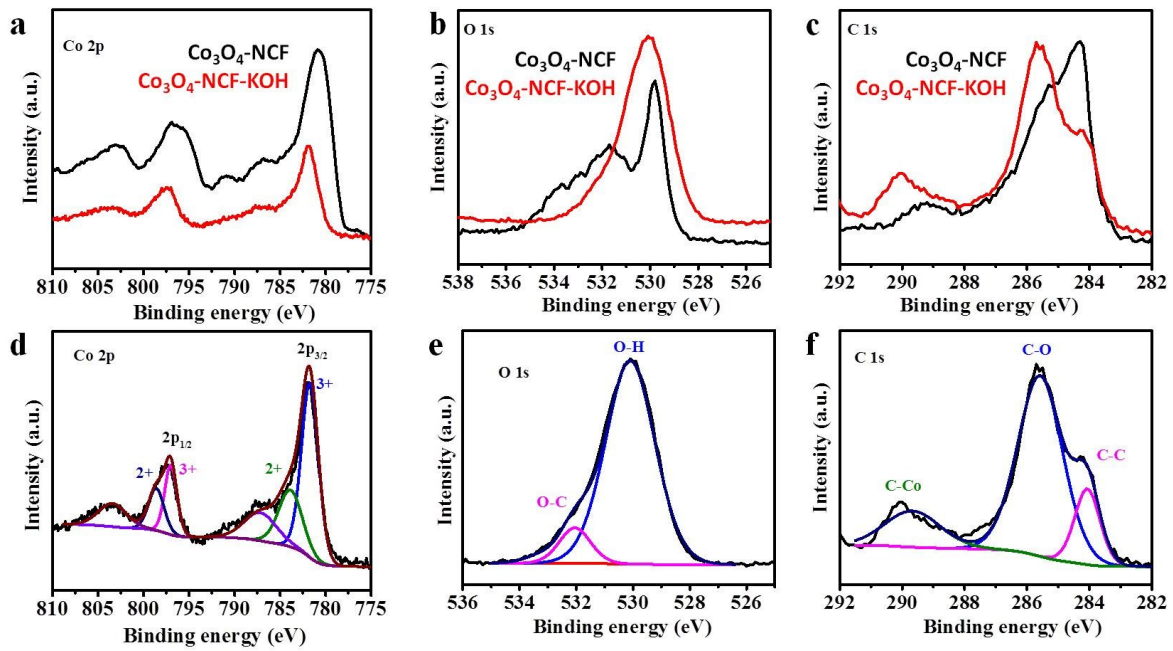

**Figure S14.** Comparison of (a) Co 2p, (b) O 1s and (c) C 1s XPS of Co<sub>3</sub>O<sub>4</sub>-NCF before and after HER in 1 M KOH. Decovoluted (d) Co 2p, (e) O 1s and (f) C 1s XPS of Co<sub>3</sub>O<sub>4</sub>-NCF after HER in 1 M KOH.

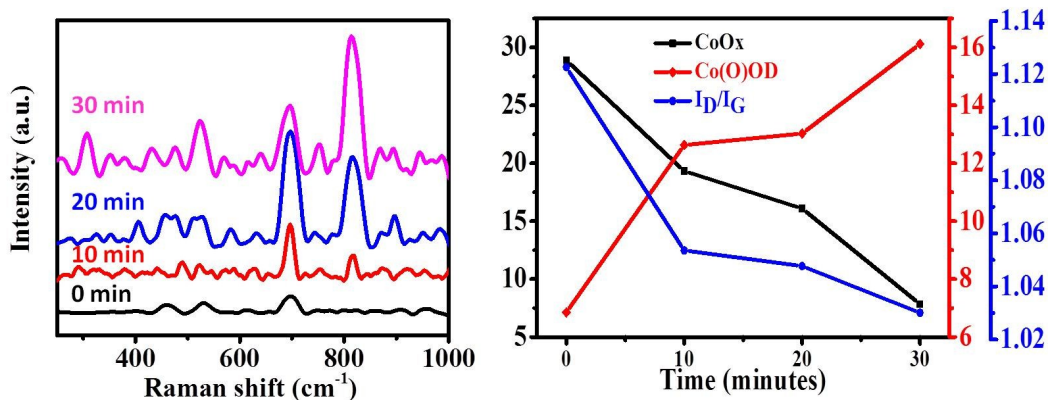

**Figure S15.** a) Time resolved in-situ Raman spectro-electrochemical study of  $\text{Co}_3\text{O}_4$ -NCF in heavy water ( $\text{D}_2\text{O}$ ) for a)HER and b) Intensity of Co-OOD peak ( $815\text{ cm}^{-1}$ ), Co-O<sub>x</sub> ( $699\text{ cm}^{-1}$ ) and  $I_D/I_G$  at  $-0.4\text{V}$  (vs RHE) with time under in-situ conditions.

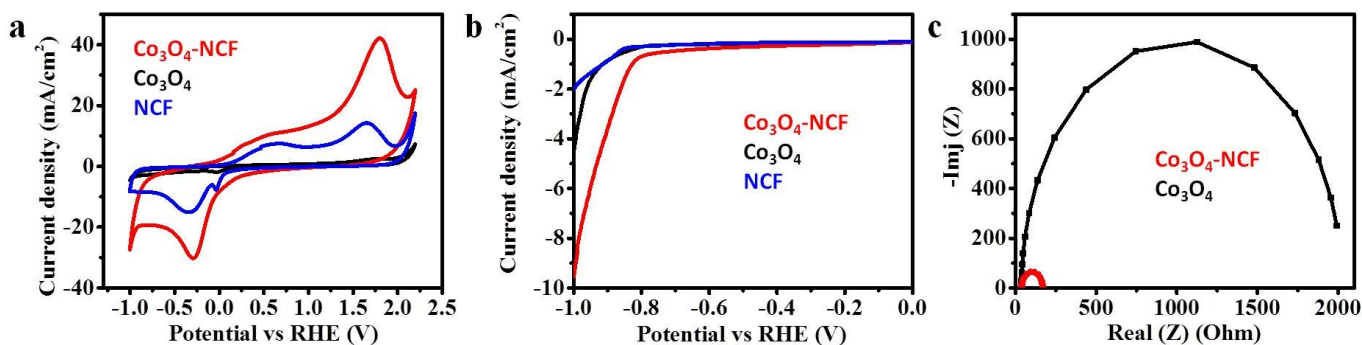

**Figure S16.** a) Cyclic voltammetry in  $0.5\text{ M HClO}_4$  of pristine NCF, pure  $\text{Co}_3\text{O}_4$  and  $\text{Co}_3\text{O}_4$ -NCF (scan rate=  $100\text{ mV/s}$ ). (b) Linear sweep voltammetry in  $0.5\text{ M HClO}_4$  pristine NCF, pure  $\text{Co}_3\text{O}_4$  and  $\text{Co}_3\text{O}_4$ -NCF (scan rate=  $2\text{ mV/s}$ ). (c) Nyquist plots of pure  $\text{Co}_3\text{O}_4$  and  $\text{Co}_3\text{O}_4$ -NCF.

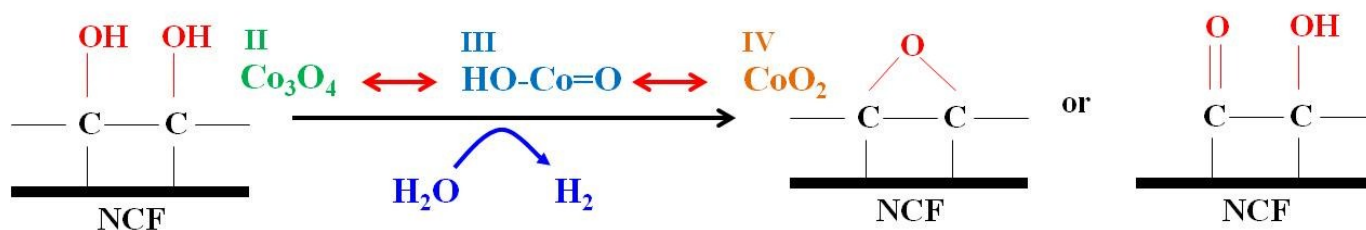

**Scheme S1.** Proposed mechanism of HER at  $\text{Co}_3\text{O}_4$ -NCF surface.

## Reference

- 1 T. R. Hellstern, J. Kibsgaard, C. Tsai, D. W. Palm, L. A. King, F. Abild-Pedersen and T. F. Jaramillo, *ACS Catal.*, 2017, **7**, 7126–7130.
- 2 Z. Jiang, Z. J. Jiang, T. Maiyalagan and A. Manthiram, *J. Mater. Chem. A*, 2016, **4**, 5877–5889.
- 3 Y. Li, H. Wang, L. Xie, Y. Liang, G. Hong and H. Dai, *J. Am. Chem. Soc.*, 2011, **133**, 7296–7299.
- 4 H. Zhang, X. Liu, Y. Wu, C. Guan, A. K. Cheetham and J. Wang, *Chem. Commun.*, 2018, **54**, 5268–5288.
- 5 Y. Liang, Y. Li, H. Wang, J. Zhou, J. Wang, T. Regier and H. Dai, *Nat. Mater.*, 2011, **10**, 780–786.

- 6 S. Zhang, X. Yu, F. Yan, C. Li, X. Zhang and Y. Chen, *J. Mater. Chem. A*, 2016, **4**, 12046–12053.
- 7 C. Huang, T. Ouyang, Y. Zou, N. Li and Z. Q. Liu, *J. Mater. Chem. A*, 2018, **6**, 7420–7427.
- 8 S. Du, Z. Ren, J. Zhang, J. Wu, W. Xi, J. Zhu and H. Fu, *Chem. Commun.*, 2015, **51**, 8066–8069.
- 9 H. S. Ahn and T. D. Tilley, *Adv. Funct. Mater.*, 2013, **23**, 227–233.
- 10 L. Hadidi, E. Davari, M. Iqbal, T. K. Purkait, D. G. Ivey and J. G. C. Veinot, *Nanoscale*, 2015, **7**, 20547–20556.
- 11 F. Hu, H. Yang, C. Wang, Y. Zhang, H. Lu and Q. Wang, *Small*, 2017, **13**, 1–8.
- 12 J. Wei, Y. Liang, X. Zhang, G. P. Simon, D. Zhao, J. Zhang, S. Jiang and H. Wang, *Nanoscale*, 2015, **7**, 6247–6254.
- 13 X. Zou, X. Huang, A. Goswami, R. Silva, B. R. Sathe and T. Asefa, *Angew. Chemie - Int. Ed.*, 2014, **53**, 4372–4376.
- 14 J. Wan, W. Chen, C. Chen, Q. Peng, D. Wang and Y. Li, *Chem. Commun.*, 2017, **53**, 12177–12180.
- 15 J. Wang, Z. Wei, H. Wang, Y. Chen and Y. Wang, *J. Mater. Chem. A*, 2017, **5**, 10510–10516.
- 16 K. Zhang, Y. Zhao, D. Fu and Y. Chen, *J. Mater. Chem. A*, 2015, **3**, 5783–5788.
- 17 A. J. Esswein, M. J. Mcmurdo, P. N. Ross, A. T. Bell and T. D. Tilley, *J. Phys. Chem. C*, 2009, **113**, 15068–15072.
- 18 A. Morozan, V. Goellner, Y. Nedellec, J. Hannauer and F. Jaouen, *J. Electrochem. Soc.*, 2015, **162**, H719–H726.
